# Supplementary material for: Co-Doped CeO2/Activated C Nanocomposite Functionalized with Ionic Liquid for Colorimetric Biosensing of H2O2 via Peroxidase Mimicking
Source: Molecules. 2023 Apr 9;28(8):3325. doi: 10.3390/molecules28083325 (PMC10145388; doi:10.3390/molecules28083325)
Supplement: Supplementary file 1 [file molecules-28-03325-s001.zip › molecules-2295938-supplementary.pdf]

## Supplementary Materials

### Co Doped CeO<sub>2</sub>/Activated C Nanocomposite Functionalized with Ionic Liquid for Colorimetric Biosensing of H<sub>2</sub>O<sub>2</sub> via Peroxidase Mimicking

Abdul Khaliq <sup>1</sup>, Ruqia Nazir <sup>1</sup>, Muslim Khan <sup>1,\*</sup>, Abdur Rahim <sup>2</sup>, Muhammad Asad <sup>1</sup>, Mohibullah Shah <sup>3</sup>, Mansoor Khan <sup>1</sup>, Riaz Ullah <sup>4</sup>, Essam A. Ali <sup>5</sup>, Ajmir Khan <sup>6</sup> and Umar Nishan <sup>1,\*</sup>

<sup>1</sup> Department of Chemistry, Kohat University of Science and Technology, Kohat KP 26000, Pakistan

<sup>2</sup> Department of Chemistry, COMSATS University Islamabad, Park Road, Islamabad 45550, Pakistan

<sup>3</sup> Department of Biochemistry, Bahauddin Zakariya University, Multan 66000, Pakistan; mohib@bzu.edu.pk

<sup>4</sup> Department of Pharmacognosy, College of Pharmacy; King Saud University Riyadh Saudi Arabia

<sup>5</sup> Department of Pharmaceutical Chemistry; College of Pharmacy; King Saud University Riyadh Saudi Arabia

<sup>6</sup> School of Packaging, 448 Wilson Rd, East Lansing, 48824 Michigan State University, MI, USA

\* Correspondence: unigraz2012@yahoo.com (M.K.); umarnishan85@gmail.com (U.N.)

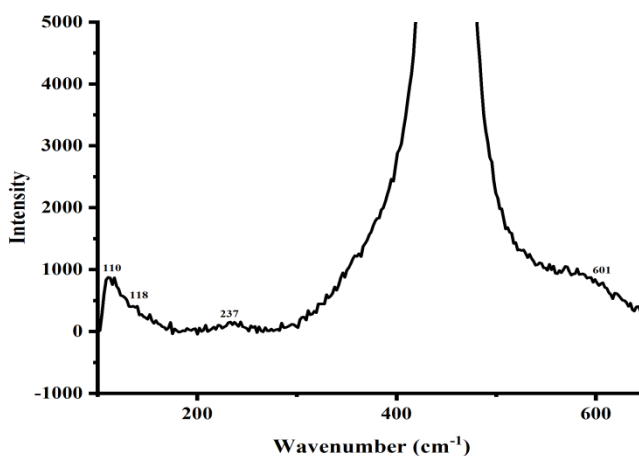

**Figure S1.** showing the peaks at 110, 118, 237 and 601 cm<sup>-1</sup>.
